# Supplementary material
Source: MDPI journal article supplement (https://www.mdpi.com/2073-4441/14/23/3801)
Supplement: s1 [file s1]

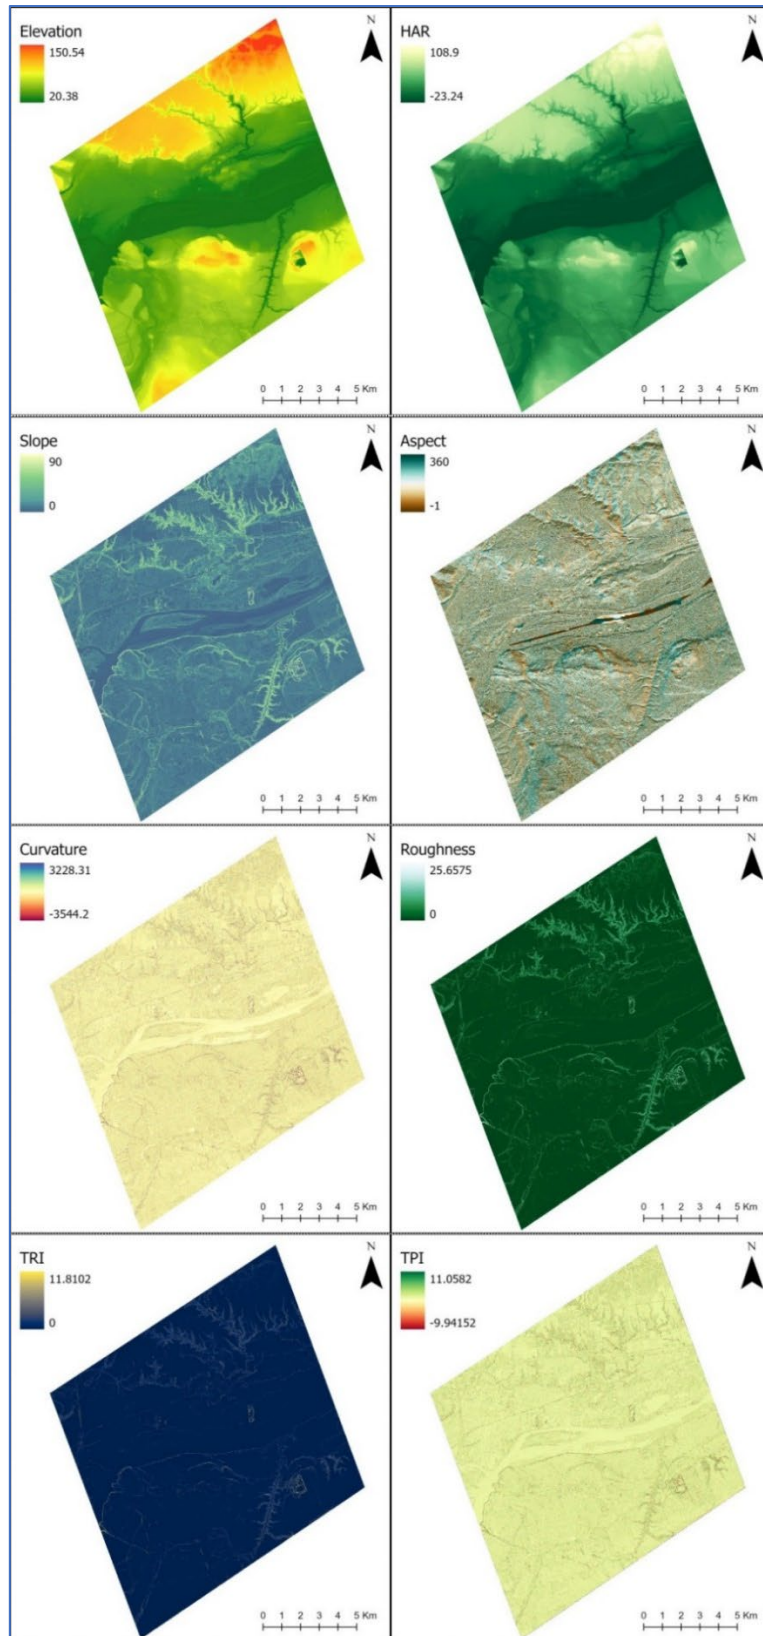

**Figure S1.** The flood conditioning factors (part 1).

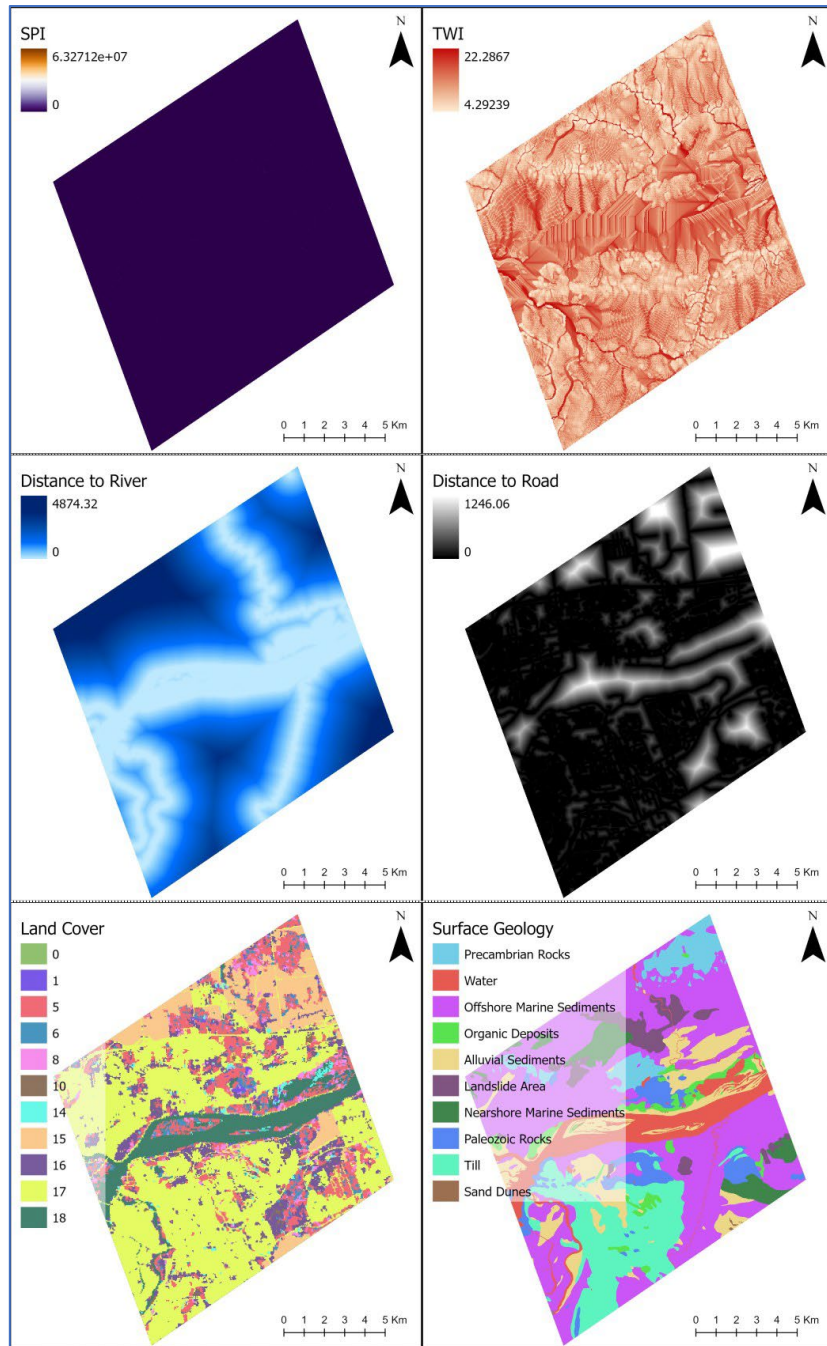

**Figure S2.** The flood conditioning factors (part 2).

**Table S1.** Random forest classification performance for single site vs multi-sites trained models.

|                   | Single site based random forest classification (10,000 points) | Multi-sites based random forest classification (15,000 points) |
|-------------------|----------------------------------------------------------------|----------------------------------------------------------------|
| Model accuracy    | 0.972                                                          | 0.971                                                          |
| Kappa coefficient | 0.944                                                          | 0.943                                                          |

**Table S2.** The distribution of the predicted flood probability and the cumulative pixels (derived from the multi-sites training random forest classification model) within the existing flood hazard areas (FDRP and RVCA maps, used for training).

| Flood Probability | Number of Pixels | Cumulative Number of Pixels | Cumulative Percentage of Pixels |
|-------------------|------------------|-----------------------------|---------------------------------|
| 0.98-1            | 22,484,324       | 22,484,324                  | 75.8%                           |
| 0.96-0.98         | 1,394,437        | 23,878,761                  | 80.5%                           |
| 0.94-0.96         | 849,798          | 24,728,559                  | 83.4%                           |
| 0.92-0.94         | 549,376          | 25,277,935                  | 85.2%                           |
| 0.9-0.92          | 456,906          | 25,734,841                  | 86.8%                           |
| 0.88-0.9          | 376,507          | 26,111,348                  | 88.1%                           |
| 0.86-0.88         | 246,685          | 26,358,033                  | 88.9%                           |
| 0.84-0.86         | 252,329          | 26,610,362                  | 89.7%                           |
| 0.82-0.84         | 177,543          | 26,787,905                  | 90.3%                           |
| 0.8-0.82          | 173,650          | 26,961,555                  | 90.9%                           |
| 0.78-0.8          | 170,758          | 27,132,313                  | 91.5%                           |
| 0.76-0.78         | 136,240          | 27,268,553                  | 92.0%                           |
| 0.74-0.76         | 119,484          | 27,388,037                  | 92.4%                           |
| 0.72-0.74         | 97,416           | 27,485,453                  | 92.7%                           |
| 0.7-0.72          | 100,452          | 27,585,905                  | 93.0%                           |
| 0.68-0.7          | 101,185          | 27,687,090                  | 93.4%                           |
| 0.66-0.68         | 74,007           | 27,761,097                  | 93.6%                           |
| 0.64-0.66         | 77,068           | 27,838,165                  | 93.9%                           |
| 0.62-0.64         | 82,110           | 27,920,275                  | 94.2%                           |
| 0.6-0.62          | 63,092           | 27,983,367                  | 94.4%                           |
| 0.58-0.6          | 69,735           | 28,053,102                  | 94.6%                           |
| 0.56-0.58         | 55,288           | 28,108,390                  | 94.8%                           |
| 0.54-0.56         | 45,064           | 28,153,454                  | 94.9%                           |
| 0.52-0.54         | 52,474           | 28,205,928                  | 95.1%                           |
| 0.5-0.52          | 40,999           | 28,246,927                  | 95.3%                           |

|           |         |            |        |
|-----------|---------|------------|--------|
| 0.48-0.5  | 46,036  | 28,292,963 | 95.4%  |
| 0.46-0.48 | 36,198  | 28,329,161 | 95.5%  |
| 0.44-0.46 | 37,789  | 28,366,950 | 95.7%  |
| 0.42-0.44 | 42,507  | 28,409,457 | 95.8%  |
| 0.4-0.42  | 34,829  | 28,444,286 | 95.9%  |
| 0.38-0.4  | 39,448  | 28,483,734 | 96.1%  |
| 0.36-0.38 | 46,678  | 28,530,412 | 96.2%  |
| 0.34-0.36 | 37,581  | 28,567,993 | 96.3%  |
| 0.32-0.34 | 42,089  | 28,610,082 | 96.5%  |
| 0.3-0.32  | 40,638  | 28,650,720 | 96.6%  |
| 0.28-0.3  | 32,505  | 28,683,225 | 96.7%  |
| 0.26-0.28 | 35,849  | 28,719,074 | 96.8%  |
| 0.24-0.26 | 40,337  | 28,759,411 | 97.0%  |
| 0.22-0.24 | 42,774  | 28,802,185 | 97.1%  |
| 0.2-0.22  | 35,064  | 28,837,249 | 97.2%  |
| 0.18-0.2  | 43,904  | 28,881,153 | 97.4%  |
| 0.16-0.18 | 90,199  | 28,971,352 | 97.7%  |
| 0.14-0.16 | 131,683 | 29,103,035 | 98.1%  |
| 0.12-0.14 | 89,022  | 29,192,057 | 98.4%  |
| 0.1-0.12  | 70,853  | 29,262,910 | 98.7%  |
| 0.08-0.1  | 44,742  | 29,307,652 | 98.8%  |
| 0.06-0.08 | 33,055  | 29,340,707 | 98.9%  |
| 0.04-0.06 | 42,202  | 29,382,909 | 99.1%  |
| 0.02-0.04 | 71,278  | 29,454,187 | 99.3%  |
| 0-0.02    | 199,205 | 29,653,392 | 100.0% |

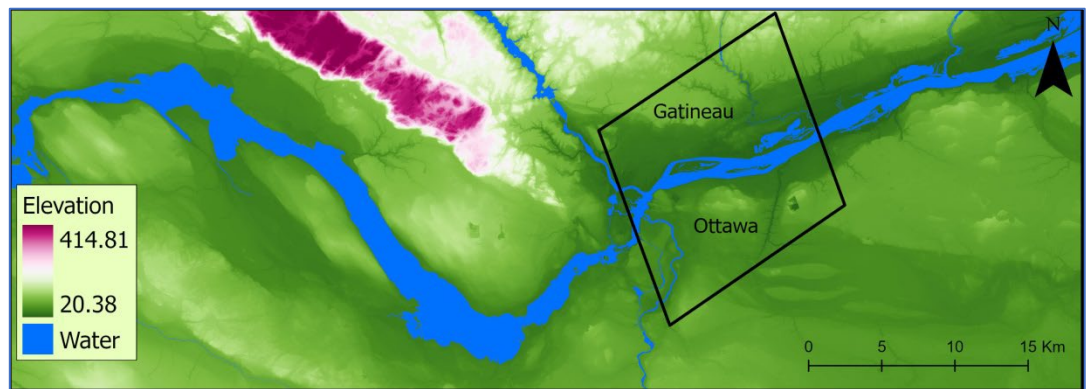

**Figure S3.** 1m resolution elevation raster across the study area.
